# Supplementary material
Source: publisher figshare collection journal article supplement (https://gsajournals.figshare.com/articles/dataset/_/9891440)
Supplement: Supplementary file 2 [file 1]

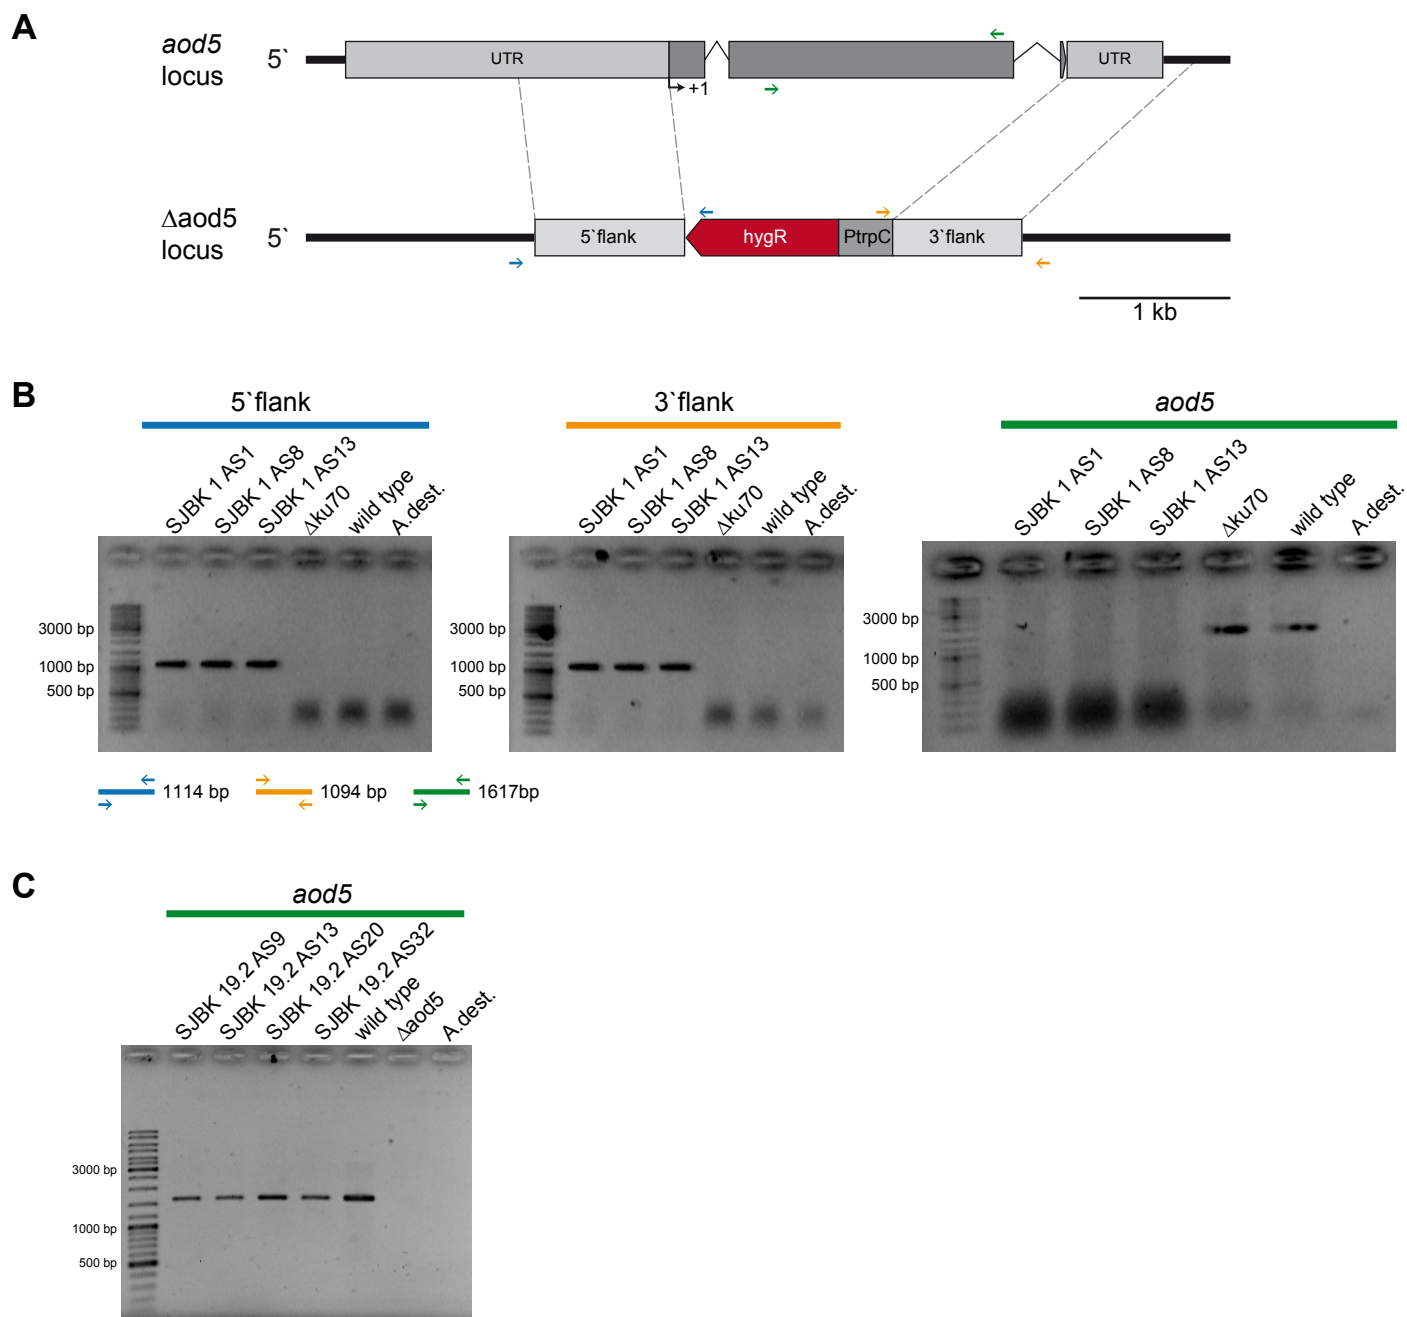

**Figure S6.** Deletion of *S. macrospora* SMAC\_06113 (*aod5*). **A.** Overview of the SMAC\_06113 locus in the wild type and deletion strains. Two introns within SMAC\_06113 are indicated as thin lines. The translation start and direction are indicated with an arrow labelled with +1. Colored arrows indicate primers used for PCRs shown in B and C. **B.** PCR analysis to verify homologous integration of the deletion cassette using primer pairs shown in blue and yellow, and verification of the deletion of the gene locus (green). Sizes of expected PCR fragments are given below **C.** PCR for verification of the presence of the *aod5* gene in complemented transformants.
