# Supplementary material
Source: publisher figshare collection journal article supplement (https://gsajournals.figshare.com/articles/dataset/_/9891440)
Supplement: Supplementary file 3 [file 1]

**A**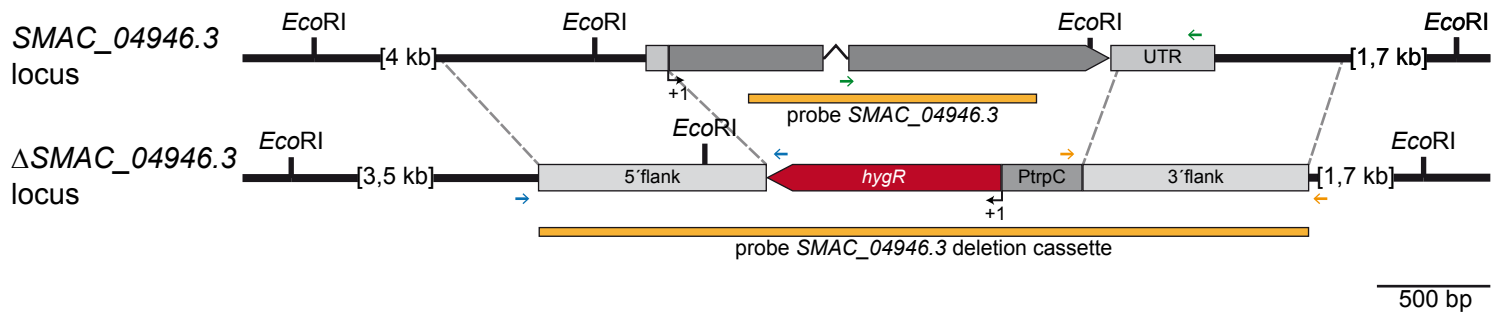**B**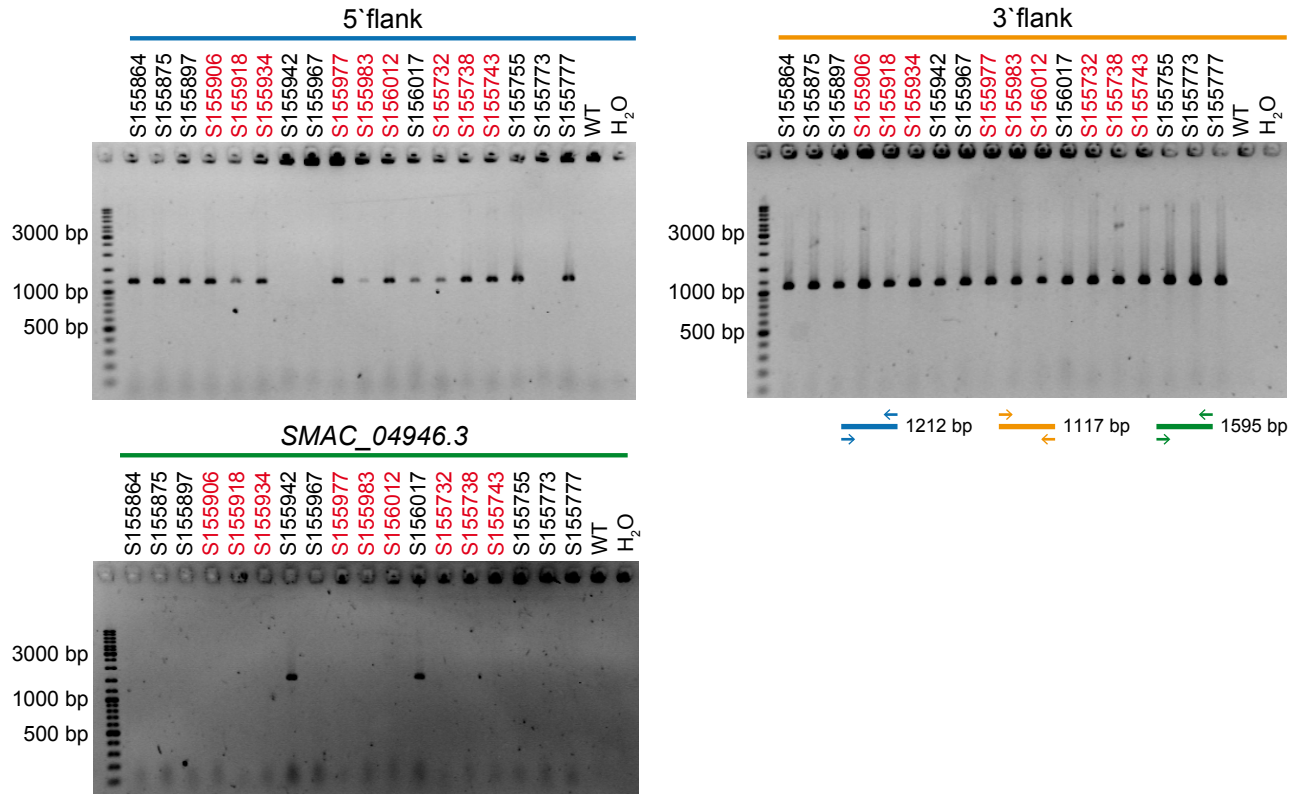**C**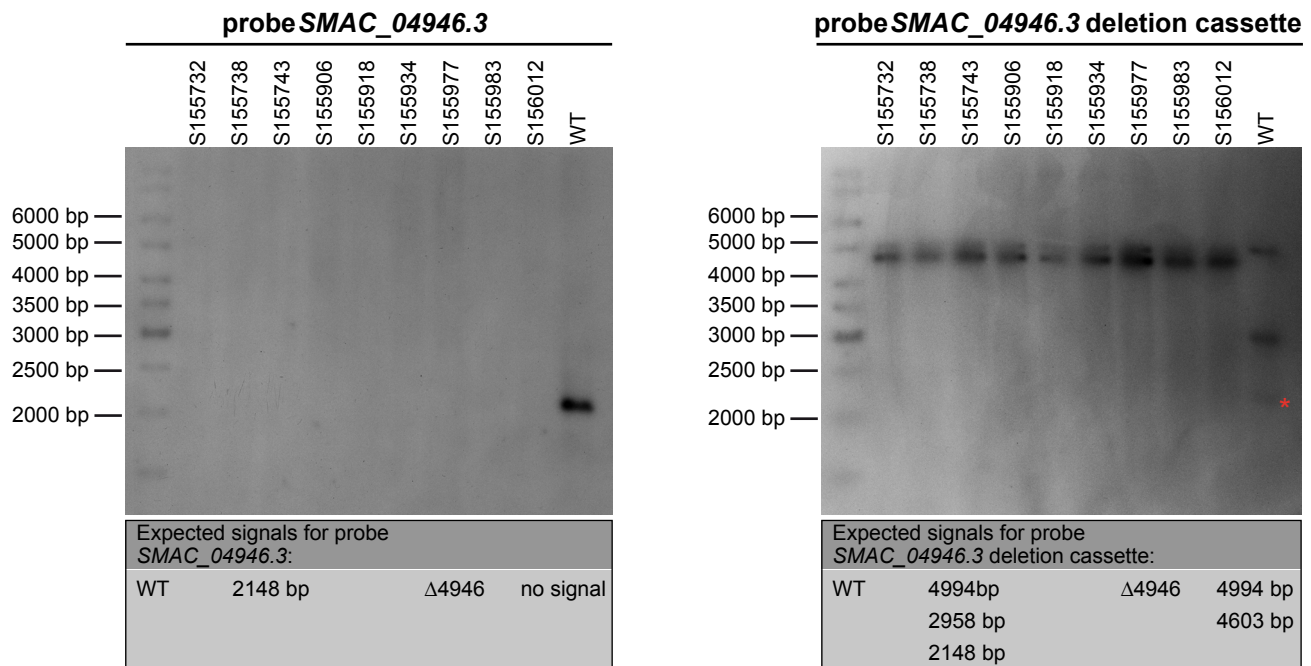

**Figure S8.** Deletion of *S. macrospora* SMAC\_04946 (*scm1*). **A.** Overview of the SMAC\_04946 locus in the wild type and deletion strains. An intron within SMAC\_04946 is indicated as thin line. The translation start and direction are indicated with an arrow labelled with +1. Colored arrows indicate primers used for PCRs shown in B. EcoRI restriction sites and probes for Southern blot analysis are indicated. **B.** PCR analysis to verify homologous integration of the deletion cassette using primer pairs shown in blue and yellow, and verification of the deletion of the gene locus (green). Sizes of expected PCR fragments are given below. Ascospore isolates labelled in red show the expected bands and were used for Southern blots analysis. **C.** Southern blot analysis with probes for the gene deletion cassette as well as the *scm1* gene. Expected signals for the wild type and deletion strains (indicated by ascospore isolate numbers) are indicated below and were detected with the corresponding probes. A weak signal in the wild type is indicated with a red asterisk.
