# Supplementary material
Source: publisher figshare collection journal article supplement (https://gsajournals.figshare.com/articles/dataset/_/9891440)
Supplement: Supplementary file 4 [file 1]

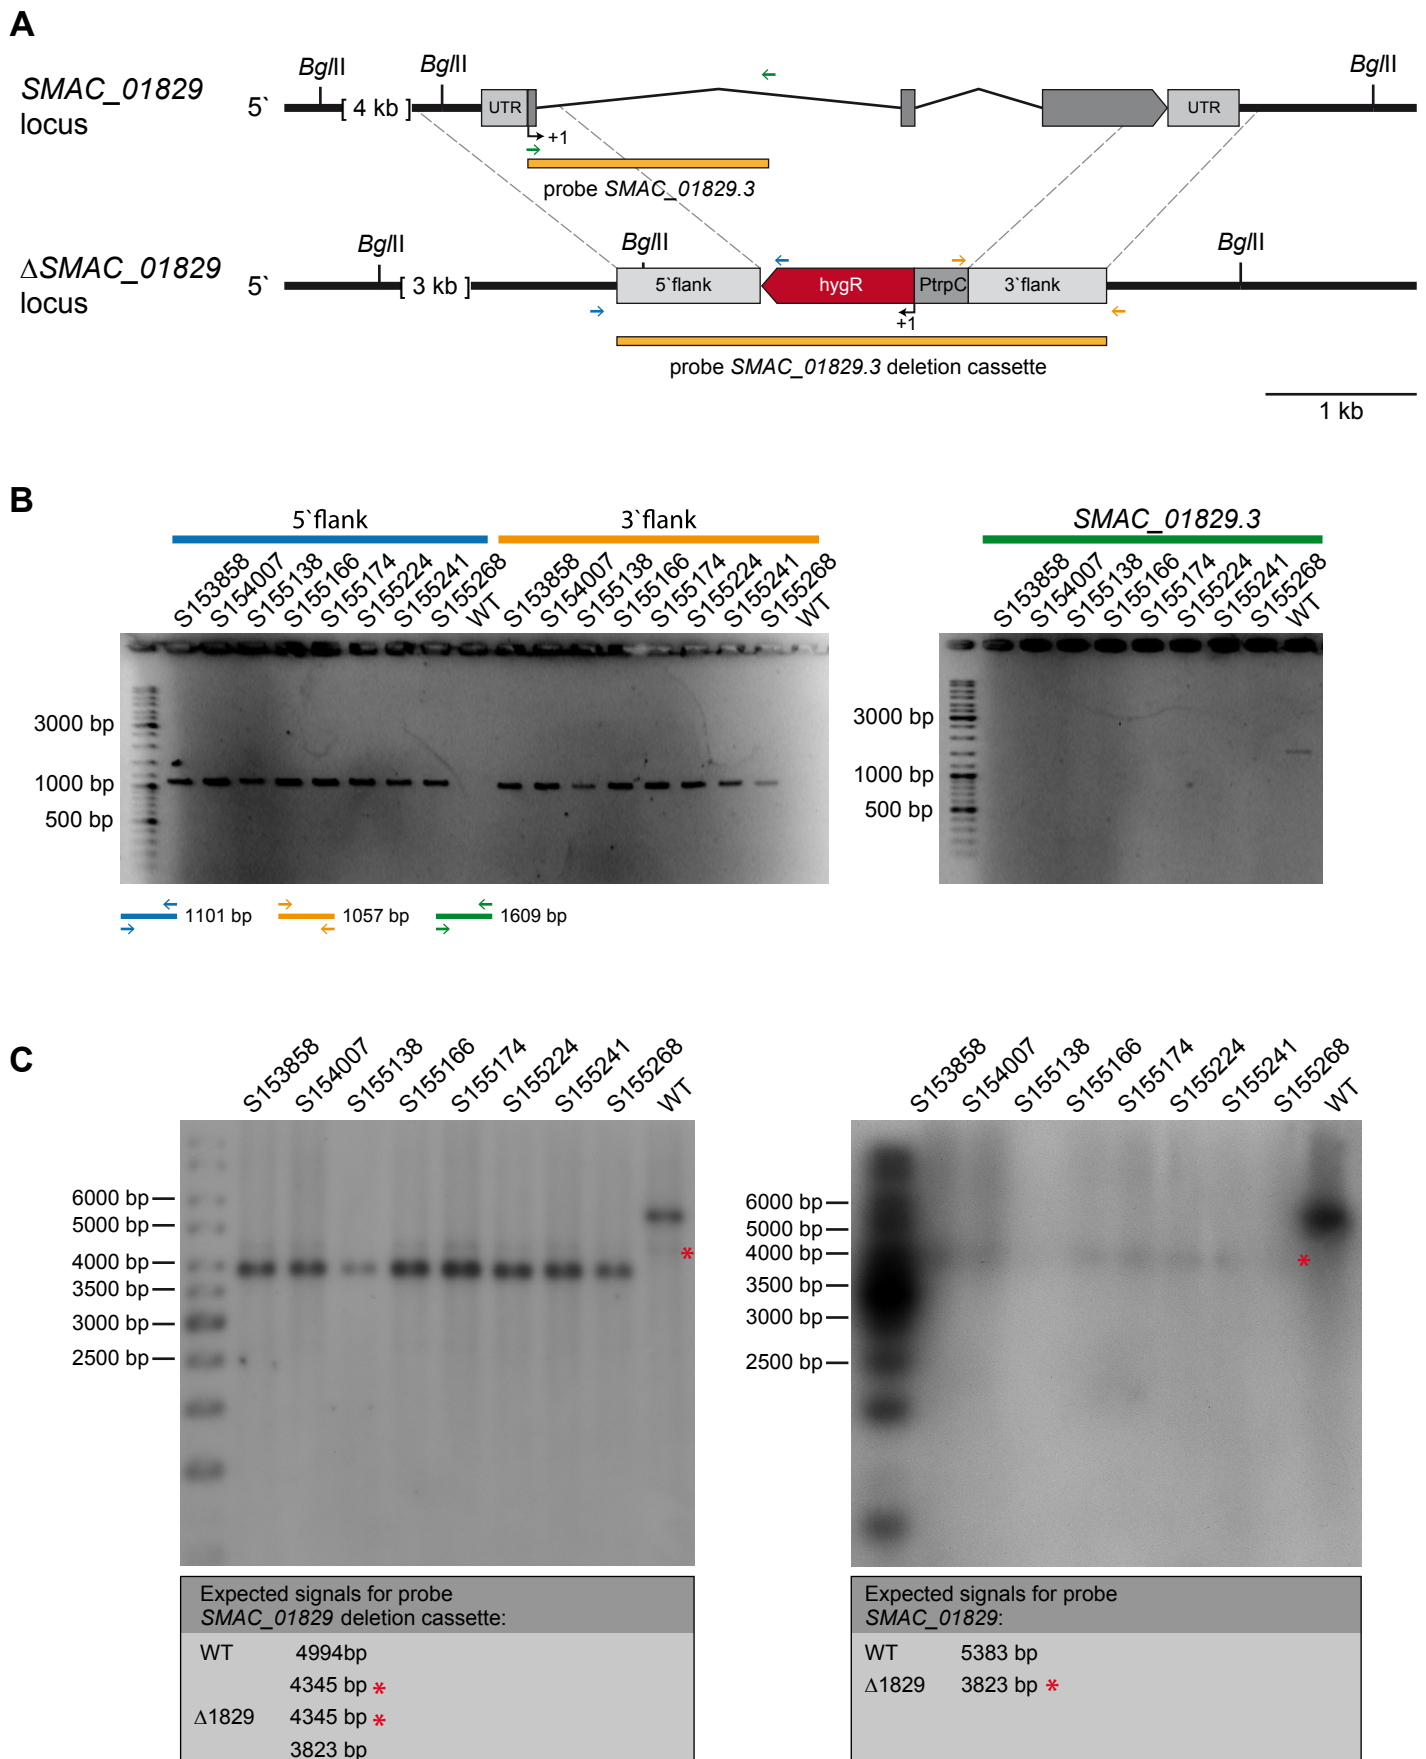

**Figure S11.** Deletion of *S. macrospora* *SMAC\_01829* (*spt3*). **A.** Overview of the *SMAC\_01829* locus in the wild type and deletion strains. Two introns within *SMAC\_04946* are indicated as thin line. The translation start and direction are indicated with an arrow labelled with +1. Colored arrows indicate primers used for PCRs shown in B. *Bgl*II restriction sites and probes for Southern blot analysis are indicated. **B.** PCR analysis to verify homologous integration of the deletion cassette using primer pairs shown in blue and yellow, and verification of the deletion of the gene locus (green). Sizes of expected PCR fragments are given below. **C.** Southern blot analysis with probes for the gene deletion cassette as well as the *spt3* gene. Expected signals for the wild type and deletion strains are indicated below and were detected with the corresponding probes. Weak signals are indicated with a red asterisk.
