# Supplementary material
Source: publisher figshare collection journal article supplement (https://gsajournals.figshare.com/articles/dataset/_/9891440)
Supplement: Supplementary file 5 [file 1]

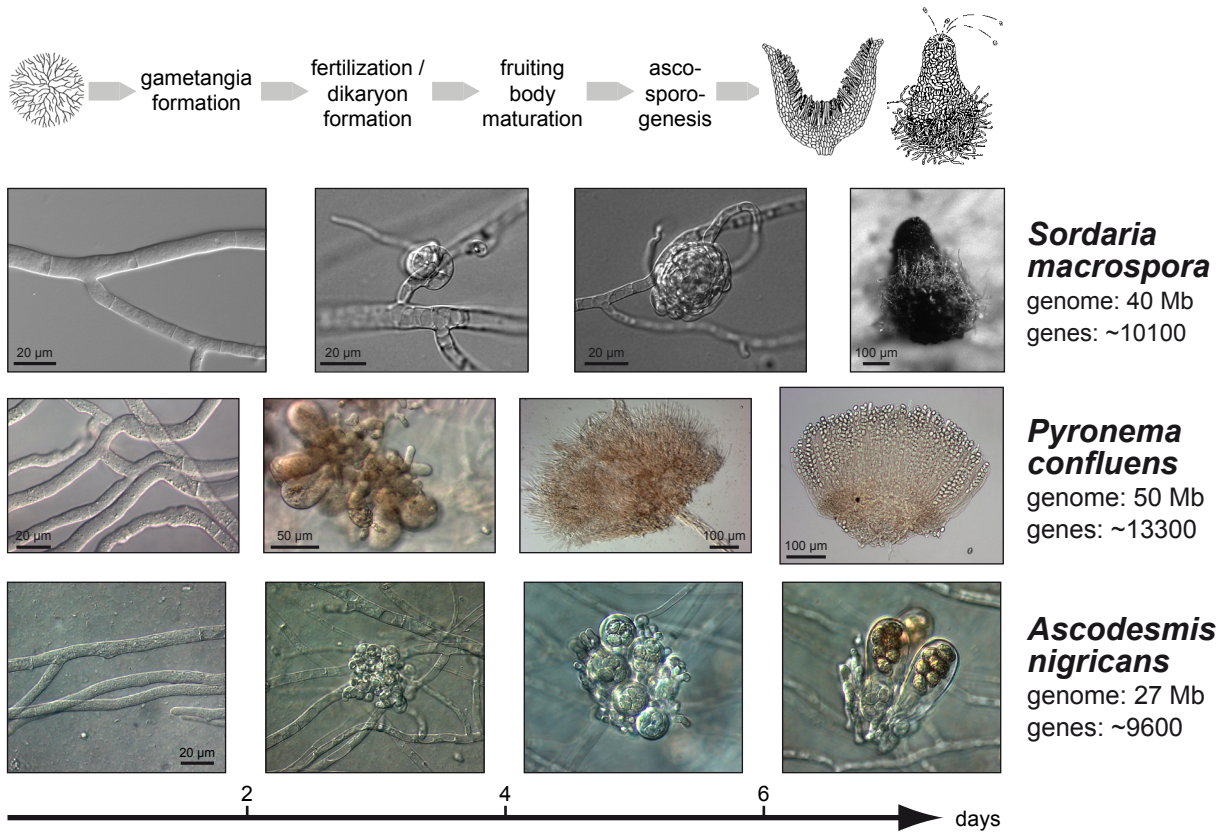

**Figure S2.** Life cycles of the three homothallic ascomycetes *A. nigricans* (Pezizomycetes), *P. confluens* (Pezizomycetes), and *S. macrospora* (Sordariomycetes). The three strains are able to complete their life cycles after one week under laboratory conditions. A schematic view of the sexual life cycle of filamentous ascomycetes is shown on top. Pictures of the *P. confluens* life cycle are from Traeger et al. (PLoS Genet 2013, 9: e1003820). For more information on the developmental stages of *A. nigricans*, see Figure 1.
