# Supplementary material
Source: publisher figshare collection journal article supplement (https://gsajournals.figshare.com/articles/dataset/_/9891440)
Supplement: Supplementary file 6 [file 1]

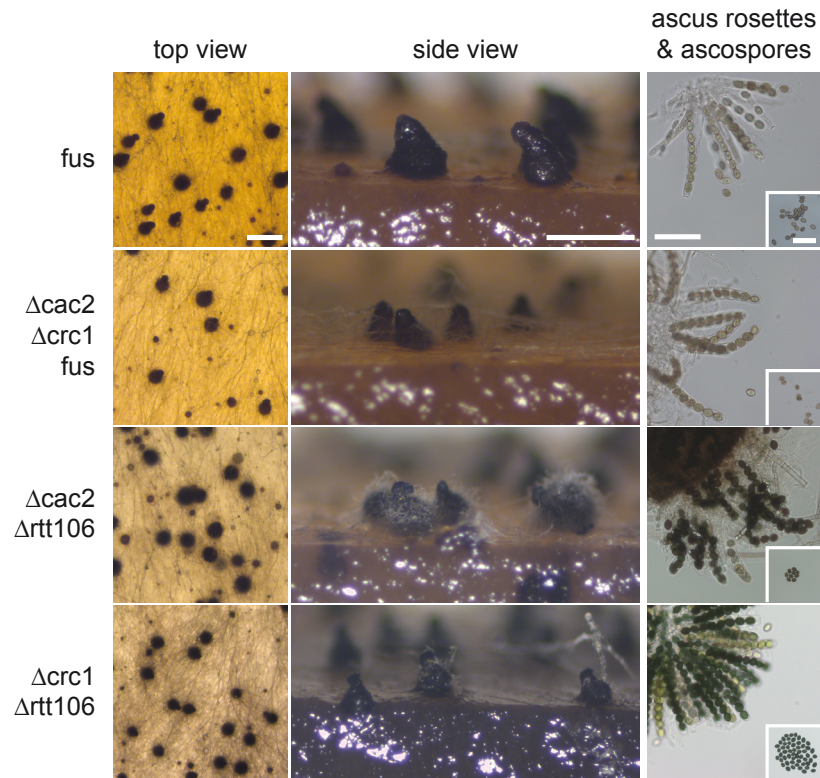

**Figure S10.** Phenotypes of chromatin modifier double mutants for the genes *cac2*, *crc1*, and *rtt106*. All double mutants involving *cac2*, *crc1*, and *rtt106* are fertile when grown on BMM medium (Schumacher et al. 2018). The spore color mutant *fus* is shown for reference, because it was used for genetic crosses. The *fus* mutant forms brown instead of black spores, and chromatin modifier mutant strains carrying the *fus* mutation also form brown spores (mutant  $\Delta cac2/\Delta crc1/fus$ ). Scale bars for top and side view 500  $\mu\text{m}$ , for ascus rosettes and spores 100  $\mu\text{m}$ .
