# Supplementary material
Source: publisher figshare collection journal article supplement (https://gsajournals.figshare.com/articles/dataset/_/9891440)
Supplement: Supplementary file 8 [file 1]

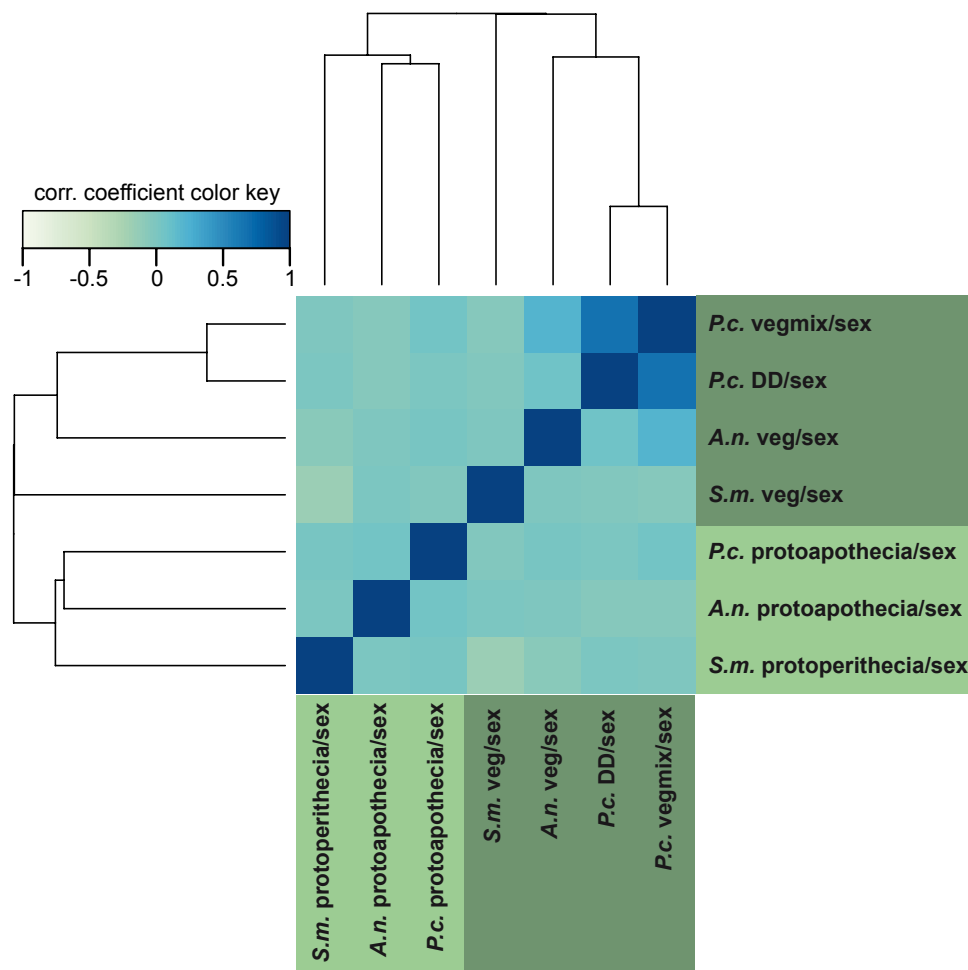

**Figure S4.** Heatmap of Spearman's correlation coefficients for pairwise comparisons of the seven sets of ratio comparisons. Included here were ratios for all orthologs (log2 fold change values). The fruiting body comparisons are more similar to each other than to the mycelial comparisons. Within the fruiting body comparisons, the two Pezizales species (*A.n.* and *P.c.*) cluster together, and the same can be seen within the vegetative mycelium-based comparisons. *A.n.*, *A. nigricans*; *P.c.*, *P. confluens*; *S.m.*, *S. macrospora*.
