# Supplementary material
Source: publisher figshare collection journal article supplement (https://gsajournals.figshare.com/articles/dataset/_/9891440)
Supplement: Supplementary file 9 [file 1]

**Table S2.** Plasmids used in this study.

| Plasmid          | Characteristics                                                                                                                              | Reference or source            |
|------------------|----------------------------------------------------------------------------------------------------------------------------------------------|--------------------------------|
| pKO_SMAC_01829   | 1 kb upstream and 1 kb downstream regions of <i>S. macrospora spt3</i> flanking the PtrpC:: <i>hph</i> cassette                              | this study                     |
| pKO_SMAC_04946   | 1 kb upstream and 1 kb downstream regions of <i>S. macrospora scm1</i> flanking the PtrpC:: <i>hph</i> cassette                              | this study                     |
| pKO_SMAC_06113   | 1 kb upstream and 1 kb downstream regions of <i>S. macrospora aod-5</i> flanking the PtrpC:: <i>hph</i> cassette                             | this study                     |
| pKO_SMAC_06770   | 0.9 kb upstream and downstream (including 3' end of CDS) regions of <i>S. macrospora SMAC_06770</i> flanking the PtrpC:: <i>hph</i> cassette | this study                     |
| pN_1829.3-GFP    | PtrpC:: <i>nat</i> , Pspt3:: <i>spt3::egfp::Tspt3</i>                                                                                        | this study                     |
| pOE_1829.3-GFP   | PtrpC:: <i>nat</i> , Pgpdc:: <i>spt3::egfp::TtrpC</i>                                                                                        | this study                     |
| pSMAC_06113_EGFP | PtrpC:: <i>nat</i> , Pgpdc:: <i>aod-5::egfp::TtrpC</i>                                                                                       | this study                     |
| pH2A-mRFP        | PtrpC:: <i>nat</i> , Pgpdc:: <i>h2A::mrfp::TtrpC</i>                                                                                         | Teichert and Kück, unpublished |
