# Supplementary material
Source: publisher figshare collection journal article supplement (https://gsajournals.figshare.com/articles/dataset/_/9891440)
Supplement: Supplementary file 10 [file 1]

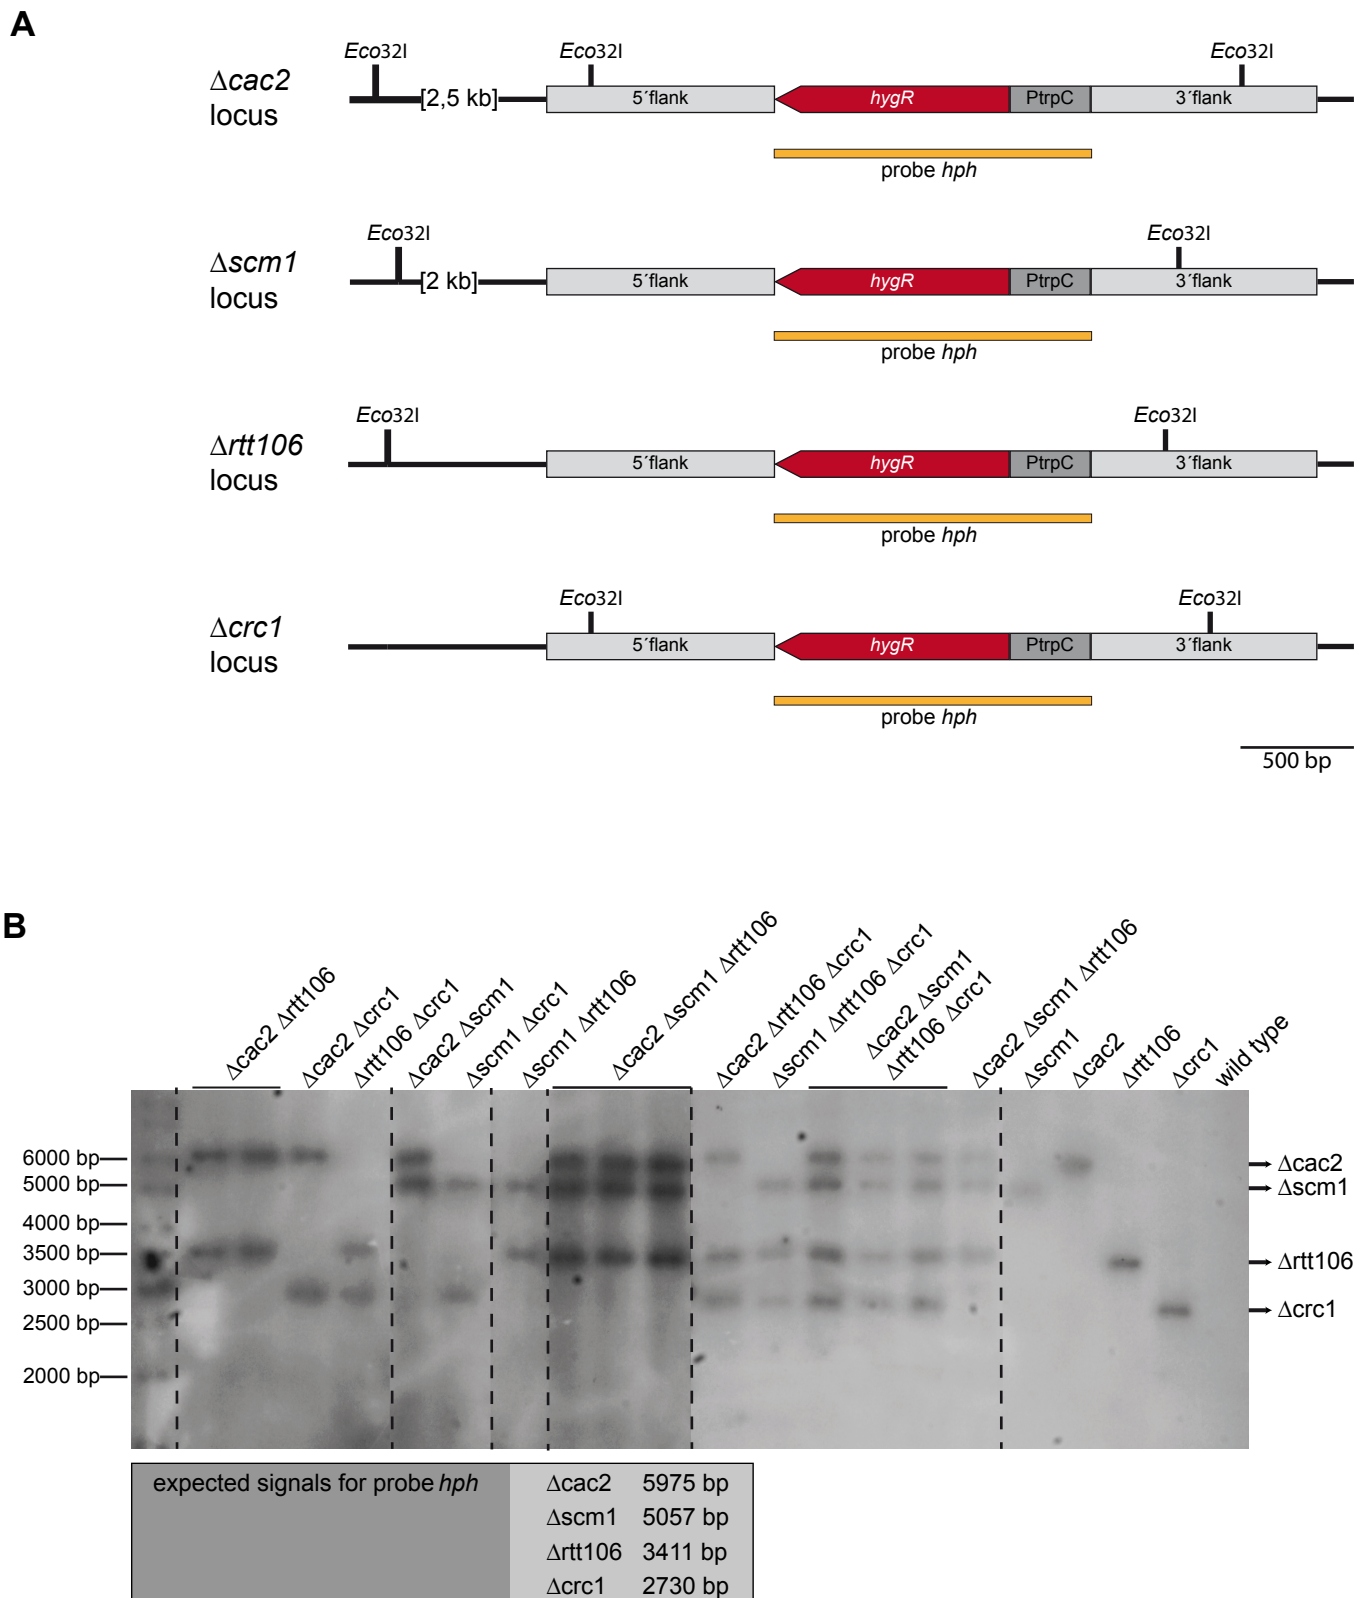

**Figure S9.** Verification of double, triple, and quadruple deletion strains of chromatin modifier genes *cac2*, *crc1*, *rtt106*, and *scm1* by Southern blot analysis. **A.** Overview of the corresponding deletion loci. *EcoRV* (*Eco321*) restriction sites and the *hph* probe used for Southern blot analysis are indicated. **B.** Southern blot analysis with the *hph* probe. Expected signals for the four gene deletions are indicated below and were detected in the corresponding mutant strains. Single deletion strains were used as controls and are shown on the right. The figure shows only strains where the expected signals were detected, other samples were left out (indicated by dashed lines to separate different sections of autoradiograms).
