# Supplementary material
Source: publisher figshare collection journal article supplement (https://gsajournals.figshare.com/articles/dataset/_/9891440)
Supplement: Supplementary file 11 [file 1]

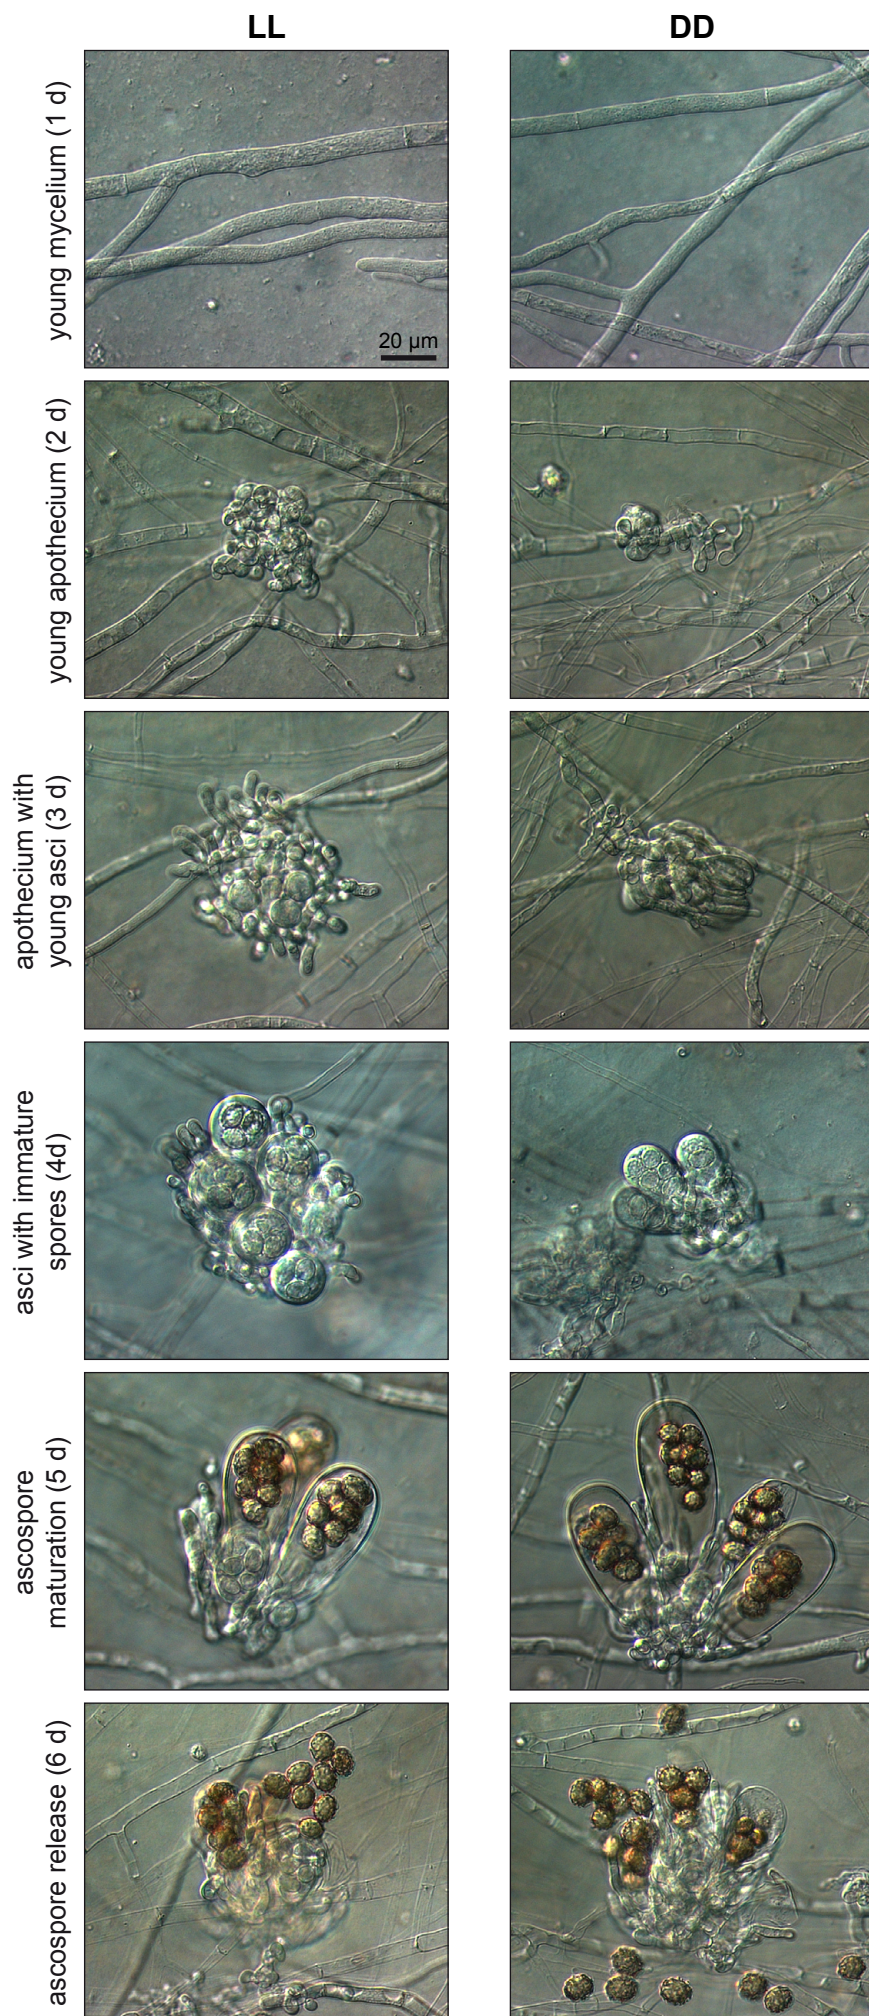

**Figure S1.** Growth and sexual development of *A. nigricans* is independent of light. Strain CBS 389.68 was grown on microscopic slides with RFA medium (+ 0.8 % agar) for 1 to 6 d in constant white light (LL) or constant darkness (DD) and development was observed from 1 to 6 d. Scale bar represents 20 µm and is the same in all images. For more information on the developmental stages, see Figure 1.
