# Supplementary material
Source: publisher figshare collection journal article supplement (https://gsajournals.figshare.com/articles/dataset/_/9891440)
Supplement: Supplementary file 12 [file 1]

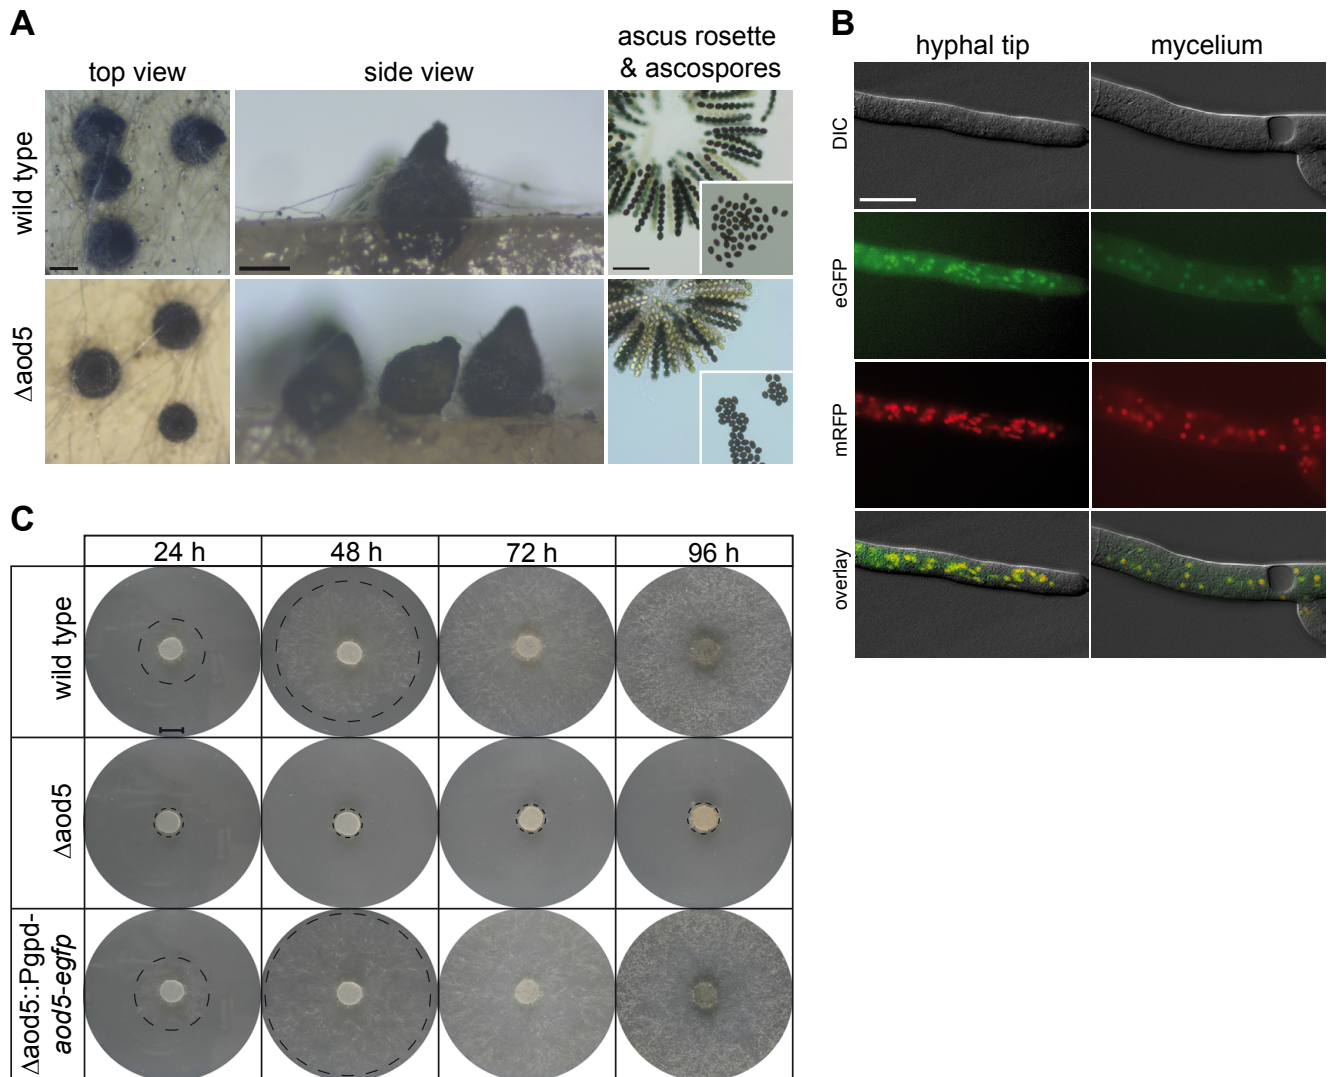

**Figure S7.** Functional analysis of *S. macrospora* SMAC\_06113 (*aod5*). **A.** Deletion of *aod5* does not result in defects during sexual development. The deletion strain forms perithecia and ascus rosettes with spores like the wild type. Scale bar for top and side view 200  $\mu$ m, and for ascus rosettes 100  $\mu$ m. **B.** AOD5 localizes to the nucleus. A complemented  $\Delta aod5$  strain expressing *aod5-egfp* and a histone 2A-mRFP fusion as nuclear marker was analyzed by fluorescence microscopy. Scale bar 20  $\mu$ m. **C.** Growth tests with antimycin A over a 96 h time course showed that *aod5* is required for induction of alternative oxidase, similar to its ortholog *aod-5* in *N. crassa* (Descheneau et al. 2005). The  $\Delta aod5$  strain was not able to grow in the presence of antimycin A, whereas the wild type and a complemented strain showed normal growth. The growth front is marked with a dashed, circular line. Scale bar 1 cm.
