# Supplementary material
Source: publisher figshare collection journal article supplement (https://gsajournals.figshare.com/articles/dataset/_/9891440)
Supplement: Supplementary file 13 [file 1]

**Table S1.** Oligonucleotides used in this study.

| Name           | Sequence 5'-3'                                                     | Remarks                                                                             |
|----------------|--------------------------------------------------------------------|-------------------------------------------------------------------------------------|
| Anig_mat1      | gacgccaaactcgccctcttataacc                                         | within <i>A. nigrificans</i> mating type region                                     |
| Anig_mat2      | aggtatggcgagatataagcctgg                                           | within <i>A. nigrificans</i> mating type region                                     |
| Anig_mat3      | gttggtctgagcgtggcaatcagg                                           | within <i>A. nigrificans</i> mating type region                                     |
| Anig_mat4      | ggttgtaggtgggattaccaatgc                                           | within <i>A. nigrificans</i> mating type region                                     |
| Anig_mat5      | ctgctgatgcccggtttcatcc                                             | within <i>A. nigrificans</i> mating type region                                     |
| Anig_mat6      | ctaaggtccagcgtcctcagagg                                            | within <i>A. nigrificans</i> mating type region                                     |
| SMAC_01829_ko1 | GTAACGCCAGGGTTTTCCAGTCACGACGg<br>aattctcgtgaagttggaggagacgggacg    | amplification of upstream region of <i>spt3</i><br>for cloning of deletion vector   |
| SMAC_01829_ko2 | cgaggggcaaaggaatagggttccgttgagg<br>gcaaaagcgtgcacggccacaaagc       | amplification of upstream region of <i>spt3</i><br>for cloning of deletion vector   |
| SMAC_01829_ko3 | gccccaaaaatgctccttcaatatcagttgc<br>ccgtcggacgatatcgtcgatatcc       | amplification of downstream region of <i>spt3</i><br>for cloning of deletion vector |
| SMAC_01829_ko4 | GCGGATAACAATTTTCACACAGGAAACAGCg<br>aattcgggtgggtctacgagcaagtgtctgc | amplification of downstream region of <i>spt3</i><br>for cloning of deletion vector |
| SMAC_04946_ko1 | GTAACGCCAGGGTTTTCCAGTCACGACGg<br>gatccGCATGGTACCTGCAAATGAGCTTGG    | amplification of upstream region of <i>scm1</i><br>for cloning of deletion vector   |
| SMAC_04946_ko2 | cgaggggcaaaggaatagggttccgttgagg<br>TTGAGAGCAAGCCCTTCATGGTGGC       | amplification of upstream region of <i>scm1</i><br>for cloning of deletion vector   |
| SMAC_04946_ko3 | gccccaaaaatgctccttcaatatcagttgc<br>tggcattgagagtgttctcggctgg       | amplification of downstream region of<br><i>scm1</i> for cloning of deletion vector |
| SMAC_04946_ko4 | GCGGATAACAATTTTCACACAGGAAACAGCg<br>gatccccctacaaggtacgggtggaggtacc | amplification of downstream region of<br><i>scm1</i> for cloning of deletion vector |
| SMAC_06113_ko1 | GTAACGCCAGGGTTTTCCAGTCACGACGg<br>aattcGTGCATACAAGCATAAAAGAACGGG    | amplification of upstream region of <i>aod5</i><br>for cloning of deletion vector   |
| SMAC_06113_ko2 | cgaggggcaaaggaatagggttccgttgagg<br>CGTGCCTTAGCTCTATATATACAGA       | amplification of upstream region of <i>aod5</i><br>for cloning of deletion vector   |
| SMAC_06113_ko3 | gccccaaaaatgctccttcaatatcagttgc<br>tcgaaaacagaataatctgctcaga       | amplification of downstream region of<br><i>aod5</i> for cloning of deletion vector |
| SMAC_06113_ko4 | GCGGATAACAATTTTCACACAGGAAACAGCg<br>aattcctaactagtagttgggtcgggtgacg | amplification of downstream region of<br><i>aod5</i> for cloning of deletion vector |
| dSMU_1         | cgatggctgtgtagaagtactcgc                                           | sequencing of deletion vector or<br>verification of homologous integration          |
| dSMU_5         | GTGTTGACCTCCACTAGCTCCAGC                                           | sequencing of deletion vector or<br>verification of homologous integration          |
| hph1_MN        | CGATGGCTGTGTAGAAGTACTCGC                                           | sequencing of deletion vector or<br>verification of homologous integration          |
| hph2_MN        | ATCCGCCTGGACGACTAAACCAA                                            | sequencing of deletion vector or<br>verification of homologous integration          |
| Sm-1829.3_fw   | agcggctgataaaggacgg                                                | verification of homologous integration of<br><i>spt3</i> deletion vector            |
| Sm-1829.3_rv   | gaactagccattgaagacctgg                                             | verification of homologous integration of<br><i>spt3</i> deletion vector            |
| Sm-1829.3_2fw  | atggcgggacaaggacaagg                                               | sequencing of <i>spt3</i> complementation<br>vector                                 |
| Sm-1829.3_2rv  | acccggtgtagcaagatgg                                                | sequencing of <i>spt3</i> complementation<br>vector                                 |

|                      |                                                                         |                                                                       |
|----------------------|-------------------------------------------------------------------------|-----------------------------------------------------------------------|
| Sm-4946.3_fw         | cctccatatcgtcgtggagtg                                                   | verification of homologous integration of <i>scm1</i> deletion vector |
| Sm-4946.3_rv         | ggttggagttttccagagtcgc                                                  | verification of homologous integration of <i>scm1</i> deletion vector |
| Sm-4946.3_2fw        | atgaggtaatcggcaacgatcc                                                  | sequencing of <i>scm1</i> complementation vector                      |
| Sm-4946.3_2rv        | cattgtgcatgccgaatctcc                                                   | sequencing of <i>scm1</i> complementation vector                      |
| Sm-6113.3_fw         | attgagagggctgctgttagg                                                   | verification of homologous integration of <i>aod5</i> deletion vector |
| Sm-6113.3_rv         | acccgccactattcacttacac                                                  | verification of homologous integration of <i>aod5</i> deletion vector |
| Sm-6113.3_2fw        | agtatccggtcttctcgtcg                                                    | sequencing of <i>aod5</i> complementation vector                      |
| Sm-6113.3_2rv        | ccagcttaccatctcgttcc                                                    | sequencing of <i>aod5</i> complementation vector                      |
| HR-1829.3-HindIII_fw | tcgagctttcccacttcatcgcagcttAAG<br>CTTatggcggacaaggacaaggacaagcag        | cloning of <i>spt3</i> complementation vector                         |
| HR-1829.3-HindIII_rv | gaacagctcctcgcccttgctcaccatAAG<br>CTTaataatcaacaaatccgtctttggcgg        | cloning of <i>spt3</i> complementation vector                         |
| HR-T1829.3_fw        | ctcggcatggacgagctgtacaagtaagca<br>gggatgtttggacggacggactg               | cloning of <i>spt3</i> complementation vector                         |
| Sm-1829.3_3fw        | aaccgctcttggatgtcg                                                      | sequencing of <i>spt3</i> complementation vector                      |
| Sm-1829.3_3rv        | ttccaggacaagaaggtgc                                                     | sequencing of <i>spt3</i> complementation vector                      |
| HR_P06113_fw         | CGCAGCTTGACTAACAGCTACAGATCTATG<br>CCGGACGACGTTGGACCCGC                  | cloning of <i>aod5</i> complementation vector                         |
| HR_EGFP_06113_rv     | GAACAGCTCCTCGCCCTTGCTCACCATCAG<br>ACTCAGCACAGCCAGTTGGTTATGACTGCG<br>GTA | cloning of <i>aod5</i> complementation vector                         |
| egfp-fw              | GGTGAACCTCAAGATCCG                                                      | sequencing of complementation vectors                                 |
| egfp-rv              | ACTTGTGGCCGTTTACGTCG                                                    | sequencing of complementation vectors                                 |
| 1751                 | gccatattttcctgctctcc                                                    | sequencing of complementation vectors                                 |
| 1757                 | agctgacatcgacaccaacg                                                    | sequencing of complementation vectors                                 |
| 426-14               | TTAAGTTGGGTAACGCCAGG                                                    | sequencing of complementation vectors                                 |
| 426-15               | TTGTGTGGAATTGTGAGCGG                                                    | sequencing of complementation vectors                                 |
